# Supplementary material for: Impact of Gestational Maternal SARS-CoV-2 Infection on Neonatal Inflammatory Biomarkers
Source: Research Square preprint supplement (doi:10.21203/rs.3.rs-8105673/v1), 2025-12-22
Supplement: Supplementary file 1 [file dd82f2ff279bc210349233e2.xlsx]

## Sheet: Sup Table 1 Overall
Biomarkers	log2FC	AveExpr	t	P.Value	adj.P.Val	B	DiffExp
CD5	0.376998	6.28614	4.47414	8.76208e-06	0.000806111	3.18649	UP
CD8A	0.273794	3.10781	3.95497	8.32038e-05	0.00382737	1.09261	UP
CD6	0.2931	3.36272	3.79076	0.000161262	0.00486609	0.48193	UP
TNFSF14	0.261692	6.29051	3.72159	0.000211569	0.00486609	0.232151	UP
PD-L1	0.179224	2.47407	3.54301	0.000418086	0.00674535	-0.392131	UP
CD244	0.212363	3.22883	3.52936	0.000439914	0.00674535	-0.438631	UP
CD40	0.218491	9.49208	3.36976	0.000787702	0.010306	-0.969326	UP
uPA	0.189645	9.35818	3.33354	0.000896176	0.010306	-1.08644	UP
TNFRSF9	0.181209	3.53865	3.2878	0.00105299	0.0107639	-1.23258	UP
IL-18R1	0.239584	4.87262	3.16587	0.00160369	0.0147539	-1.61255	UP
TGF-alpha	0.176476	2.29538	3.07343	0.00218662	0.0182881	-1.89129	UP
TRAIL	0.161666	5.15195	2.98389	0.00293104	0.0224713	-2.15358	UP
CCL20	0.251784	4.27695	2.92376	0.00355418	0.0251527	-2.32549	UP
CXCL6	0.195928	7.23756	2.81952	0.00492622	0.0323723	-2.61534	UP
OPG	0.128142	4.549	2.73208	0.00642984	0.0374153	-2.85054	UP
HGF	0.195705	7.7596	2.70555	0.00696152	0.0374153	-2.92045	UP
SIRT2	0.068585	7.50723	2.67687	0.00758077	0.0374153	-2.99529	UP
CCL25	0.149464	1.17963	2.67515	0.00761931	0.0374153	-2.99974	UP
CXCL5	0.245049	10.6142	2.6704	0.00772708	0.0374153	-3.01206	UP
MMP-1	0.263364	12.1453	2.57893	0.0100849	0.0450848	-3.24492	UP
VEGFA	0.166764	10.5556	2.57187	0.0102911	0.0450848	-3.26256	UP
MCP-4	0.20741	11.9569	2.52206	0.0118563	0.0495809	-3.38568	UP
IL-12B	0.165875	2.57811	2.42178	0.015662	0.062648	-3.62637	NO
IL-10RA	0.0523379	-1.02899	2.35603	0.0187072	0.0717108	-3.77894	NO
FGF-19	0.189374	2.63745	2.32014	0.0205795	0.0726275	-3.86048	NO
CXCL1	0.136258	10.3251	2.31586	0.0208133	0.0726275	-3.87013	NO
CCL23	0.171329	8.09267	2.30682	0.0213146	0.0726275	-3.89042	NO
MMP-10	0.141863	5.01738	2.23762	0.0255151	0.0817308	-4.04327	NO
Flt3L	0.113727	4.54858	2.23386	0.025763	0.0817308	-4.05145	NO
DNER	0.0905089	4.6753	2.20809	0.0275155	0.0843809	-4.10709	NO
IL8	0.192605	8.45734	2.18486	0.0291832	0.0866081	-4.15672	NO
LAP TGF-beta-1	0.103717	5.38243	2.17195	0.0301471	0.086673	-4.18407	NO
CXCL9	0.117455	1.67242	2.06816	0.0389399	0.10856	-4.39814	NO
IL7	0.0655775	-0.289626	1.89204	0.0588403	0.153022	-4.73767	NO
FGF-5	0.0742062	0.0814495	1.8844	0.0598671	0.153022	-4.75172	NO
CXCL11	0.177391	5.51995	1.87787	0.0607553	0.153022	-4.76367	NO
IL-15RA	0.0608214	0.231852	1.87217	0.0615414	0.153022	-4.77409	NO
TSLP	0.061845	-0.155085	1.78961	0.0738877	0.178886	-4.92136	NO
IL-20	0.0413818	-0.166067	1.74197	0.0818909	0.193179	-5.00334	NO
CDCP1	0.0705454	-0.105346	1.70077	0.0893675	0.2007	-5.07247	NO
AXIN1	0.108059	5.74795	1.70037	0.0894425	0.2007	-5.07313	NO
ADA	0.0497948	10.8516	1.65491	0.0983287	0.215387	-5.14749	NO
CX3CL1	0.0728314	0.852701	1.60173	0.109604	0.229507	-5.23193	NO
TRANCE	0.0884618	2.05102	1.601	0.109764	0.229507	-5.23306	NO
IL13	0.0424821	-0.777743	1.51905	0.129139	0.264017	-5.35777	NO
OSM	0.114319	6.3255	1.49911	0.134232	0.268463	-5.38711	NO
CCL11	0.109329	4.06517	1.46506	0.14329	0.280483	-5.43635	NO
IL10	0.0671222	-0.190922	1.41014	0.15888	0.30452	-5.5134	NO
TNFB	0.0416267	1.0962	1.39628	0.16301	0.306059	-5.53238	NO
CST5	0.119476	3.07938	1.32576	0.185291	0.340935	-5.62607	NO
IL2	0.0419743	-0.0452661	1.20985	0.226686	0.405477	-5.76954	NO
SCF	0.0650265	2.79369	1.20337	0.229182	0.405477	-5.77718	NO
EN-RAGE	0.0676708	6.68677	1.17163	0.241689	0.419536	-5.814	NO
FGF-23	0.0630988	-0.138653	1.14845	0.251118	0.42783	-5.84025	NO
TNF	0.0658604	0.720435	1.13318	0.257473	0.430682	-5.85728	NO
IL4	0.040117	-0.265529	1.10995	0.267347	0.439213	-5.88272	NO
IL-10RB	0.043258	2.06233	1.0817	0.279704	0.451452	-5.91296	NO
IL-17A	0.0345667	-0.607461	1.02061	0.307743	0.488144	-5.97571	NO
IL18	-0.06761	9.51242	-0.965327	0.334667	0.521854	-6.02934	NO
Beta-NGF	0.00997093	1.55673	0.940896	0.347037	0.532123	-6.0521	NO
CSF-1	0.0346906	5.73479	0.841304	0.400424	0.603919	-6.13884	NO
NT-3	0.0308412	1.38505	0.815153	0.415223	0.616138	-6.16001	NO
CXCL10	0.0578564	3.23964	0.785074	0.432639	0.63179	-6.18354	NO
CASP-8	0.0302996	7.33892	0.766478	0.443614	0.637695	-6.19764	NO
ARTN	0.0290753	-0.730266	0.734932	0.462592	0.654746	-6.2208	NO
TWEAK	0.0315697	5.33298	0.687742	0.491811	0.672691	-6.25362	NO
IL5	0.0241397	-0.368509	0.682926	0.494847	0.672691	-6.25684	NO
IL-17C	0.0537905	1.57415	0.679196	0.497206	0.672691	-6.25933	NO
CCL3	0.0786231	5.15433	0.656763	0.511519	0.673899	-6.27398	NO
MCP-1	0.0573081	10.2345	0.65485	0.512749	0.673899	-6.27521	NO
IL-20RA	0.0177034	-0.0669655	0.626686	0.531041	0.688109	-6.29285	NO
SLAMF1	0.0218662	-0.357144	0.57656	0.564396	0.721172	-6.32235	NO
IL-22 RA1	0.033154	-0.370103	0.557807	0.57713	0.727341	-6.33275	NO
CCL28	0.0145765	0.770043	0.53433	0.593259	0.737565	-6.34529	NO
GDNF	0.0202617	0.581726	0.501695	0.616018	0.755648	-6.36182	NO
LIF	0.0118003	-0.327297	0.459437	0.646043	0.782052	-6.38168	NO
LIF-R	0.00829591	0.422159	0.435116	0.663593	0.792327	-6.39232	NO
MCP-2	0.0273601	5.70526	0.414948	0.678289	0.792327	-6.40071	NO
IL-1 alpha	-0.0631883	2.96014	-0.41211	0.680368	0.792327	-6.40186	NO
IL6	0.0418289	1.74178	0.363957	0.715984	0.815973	-6.42013	NO
4E-BP1	-0.00760396	8.66091	-0.358567	0.720012	0.815973	-6.42204	NO
STAMBP	-0.00514485	9.75825	-0.348865	0.727281	0.815973	-6.42539	NO
IFN-gamma	0.0244519	3.08144	0.226282	0.821039	0.910067	-6.45988	NO
CCL19	0.0111899	6.89679	0.187143	0.851595	0.932699	-6.46779	NO
FGF-21	-0.015272	2.03112	-0.138317	0.890024	0.951802	-6.47557	NO
CCL4	-0.00899248	5.30833	-0.134338	0.893169	0.951802	-6.4761	NO
ST1A1	0.00722407	5.13651	0.125607	0.900074	0.951802	-6.47721	NO
IL-2RB	-0.00311415	-0.15334	-0.111502	0.911246	0.95201	-6.47885	NO
IL-24	-0.00557138	-0.142537	-0.0992471	0.920966	0.95201	-6.48011	NO
MCP-3	0.00640244	0.615564	0.0862023	0.931327	0.952023	-6.48129	NO
NRTN	-0.00170307	-0.776503	-0.0703947	0.943897	0.954269	-6.4825	NO
IL33	-0.00100531	0.931633	-0.0334541	0.973321	0.973321	-6.48438	NO

## Sheet: Sup Table 2 Early
Biomarkers	log2FC	AveExpr	t	P.Value	adj.P.Val	B	DiffExp
TNFSF14	0.463056	6.28312	4.31282	1.82649e-05	0.00116534	2.52353	UP
TGF-alpha	0.372888	2.29335	4.23816	2.53335e-05	0.00116534	2.21937	UP
HGF	0.403468	7.75768	3.64482	0.000285962	0.00757173	-0.0170193	UP
EN-RAGE	0.317587	6.69649	3.6078	0.000329205	0.00757173	-0.145829	UP
FGF-19	0.402355	2.62964	3.1935	0.0014641	0.0269394	-1.50039	UP
IL-18R1	0.354847	4.86303	3.0378	0.00246542	0.0300964	-1.96796	UP
TRAIL	0.254604	5.14752	3.02441	0.00257585	0.0300964	-2.00711	UP
uPA	0.264969	9.35016	3.01955	0.00261707	0.0300964	-2.0213	UP
IL18	-0.309276	9.50452	-2.86216	0.00432447	0.0442057	-2.46808	DOWN
OSM	0.316632	6.33266	2.70448	0.00699565	0.0599122	-2.8922	NO
IL13	0.11451	-0.776963	2.66744	0.00780733	0.0599122	-2.98841	NO
IL-10RA	0.0913567	-1.03054	2.65631	0.00806744	0.0599122	-3.01709	NO
SIRT2	0.102176	7.50283	2.63986	0.00846585	0.0599122	-3.05923	NO
FGF-5	0.155504	0.0805441	2.55107	0.0109361	0.0673639	-3.28224	NO
VEGFA	0.254914	10.55	2.54955	0.0109832	0.0673639	-3.28598	NO
CCL23	0.286886	8.09232	2.48969	0.013	0.0747502	-3.43201	NO
TNFRSF9	0.204807	3.53031	2.39208	0.0169975	0.0919865	-3.66284	NO
IL4	0.131122	-0.262926	2.34037	0.019525	0.0974609	-3.78143	NO
MMP-1	0.367598	12.1279	2.32891	0.0201278	0.0974609	-3.80737	NO
CCL19	-0.195083	6.88754	-2.12798	0.0336627	0.154849	-4.24171	NO
IL-20	0.0752982	-0.167048	2.05713	0.0400181	0.175317	-4.38566	NO
CD5	0.262877	6.25035	2.01067	0.0447166	0.186997	-4.47742	NO
PD-L1	0.151549	2.4585	1.9661	0.0496542	0.198617	-4.56351	NO
CXCL1	0.16274	10.3182	1.79757	0.0726458	0.278476	-4.87175	NO
ARTN	0.107659	-0.728049	1.75518	0.079635	0.293057	-4.94498	NO
MMP-10	0.157085	5.00859	1.58362	0.1137	0.402324	-5.22363	NO
IL2	0.0831234	-0.0456861	1.52614	0.127396	0.414111	-5.31063	NO
OPG	0.1103	4.53861	1.519	0.129181	0.414111	-5.3212	NO
LIF	0.0604429	-0.326173	1.51365	0.130535	0.414111	-5.32911	NO
NRTN	0.0553929	-0.773825	1.47666	0.140185	0.429899	-5.38295	NO
Beta-NGF	0.0236428	1.55647	1.43037	0.153026	0.430832	-5.44848	NO
CSF-1	-0.0904413	5.72641	-1.41057	0.158785	0.430832	-5.47587	NO
CCL3	0.262827	5.15632	1.40483	0.160484	0.430832	-5.48374	NO
CST5	0.195494	3.06886	1.39158	0.164462	0.430832	-5.50179	NO
IL-20RA	0.0612331	-0.0663629	1.38504	0.166451	0.430832	-5.51063	NO
IL8	0.184479	8.44443	1.37624	0.169156	0.430832	-5.52246	NO
IL-1 alpha	-0.323845	2.95548	-1.36306	0.17327	0.430832	-5.54004	NO
CD244	0.122946	3.20642	1.32893	0.184273	0.439106	-5.5848	NO
CXCL9	0.11427	1.66334	1.30158	0.193459	0.439106	-5.61985	NO
IL5	0.0715194	-0.36771	1.2983	0.194582	0.439106	-5.62401	NO
IL-24	0.111905	-0.134938	1.29508	0.195689	0.439106	-5.62807	NO
CXCL6	0.136393	7.22093	1.27673	0.20209	0.442673	-5.65106	NO
FGF-23	0.106253	-0.143277	1.24492	0.213548	0.446887	-5.69015	NO
MCP-2	-0.127748	5.69163	-1.2411	0.214956	0.446887	-5.69478	NO
IL-15RA	0.062084	0.226967	1.23132	0.218586	0.446887	-5.70656	NO
CD6	0.143024	3.33143	1.19882	0.230976	0.461951	-5.74505	NO
CCL25	0.100129	1.16329	1.16522	0.2443	0.478204	-5.78377	NO
NT-3	0.0664113	1.38439	1.12255	0.261984	0.502137	-5.83134	NO
TNF	0.100853	0.718393	1.08729	0.277258	0.520567	-5.86934	NO
IL10	0.0743683	-0.197639	1.07039	0.284785	0.524004	-5.88711	NO
LAP TGF-beta-1	0.0752404	5.37296	1.03015	0.303272	0.547079	-5.92833	NO
IL7	0.0536832	-0.294411	1.00545	0.315003	0.557313	-5.95284	NO
CDCP1	-0.0574242	-0.118344	-0.956222	0.339267	0.586891	-5.99994	NO
STAMBP	-0.0207644	9.7577	-0.945947	0.344479	0.586891	-6.00947	NO
CD8A	0.0943805	3.07913	0.879851	0.379221	0.634333	-6.06833	NO
ST1A1	0.0738721	5.14177	0.849424	0.395915	0.650432	-6.094	NO
SCF	0.0623509	2.78664	0.748684	0.454281	0.733226	-6.17254	NO
CCL28	-0.0299698	0.766231	-0.699685	0.48434	0.768264	-6.20717	NO
CASP-8	0.039903	7.33744	0.668964	0.503723	0.78347	-6.22769	NO
CXCL5	0.0933345	10.5857	0.657659	0.510959	0.78347	-6.23501	NO
MCP-4	-0.0783247	11.9279	-0.613412	0.539789	0.798197	-6.26246	NO
IFN-gamma	-0.101657	3.07315	-0.612841	0.540166	0.798197	-6.2628	NO
IL-17A	0.0312954	-0.610064	0.603149	0.546591	0.798197	-6.26855	NO
MCP-1	-0.0716188	10.2288	-0.538729	0.590233	0.811299	-6.30446	NO
IL-10RB	0.0334457	2.0578	0.538238	0.590572	0.811299	-6.30472	NO
CD40	0.0521986	9.46821	0.529032	0.596939	0.811299	-6.30951	NO
CX3CL1	0.0350367	0.844465	0.499969	0.617243	0.811299	-6.32411	NO
IL-12B	0.0538022	2.56212	0.49915	0.617819	0.811299	-6.32451	NO
IL6	-0.0828907	1.72741	-0.484012	0.628518	0.811299	-6.33177	NO
ADA	0.0217687	10.8464	0.470148	0.638385	0.811299	-6.33823	NO
SLAMF1	0.0268003	-0.358367	0.455535	0.648856	0.811299	-6.34484	NO
DNER	0.028503	4.66342	0.448167	0.654162	0.811299	-6.34809	NO
IL-17C	0.0525782	1.57007	0.430302	0.667099	0.811299	-6.35575	NO
TNFB	-0.0198546	1.08887	-0.427425	0.669192	0.811299	-6.35695	NO
Flt3L	0.0337616	4.53403	0.426459	0.669895	0.811299	-6.35736	NO
GDNF	0.0270825	0.580432	0.426036	0.670204	0.811299	-6.35753	NO
IL33	0.0193295	0.932401	0.411108	0.68111	0.813794	-6.36363	NO
IL-22 RA1	0.0277881	-0.372826	0.296341	0.767051	0.884904	-6.40327	NO
TSLP	-0.0159531	-0.163346	-0.294431	0.76851	0.884904	-6.40382	NO
LIF-R	-0.00855068	0.419991	-0.293159	0.769481	0.884904	-6.40419	NO
MCP-3	0.0307931	0.620612	0.265473	0.790718	0.893844	-6.41174	NO
IL-2RB	-0.0111717	-0.15373	-0.257728	0.796687	0.893844	-6.41372	NO
CCL4	0.0239952	5.31053	0.22915	0.818814	0.902582	-6.42051	NO
CCL11	0.0256048	4.05789	0.222356	0.824097	0.902582	-6.42201	NO
FGF-21	-0.0281652	2.03761	-0.163282	0.87034	0.942015	-6.43313	NO
CXCL11	-0.0199806	5.4958	-0.138627	0.889782	0.95186	-6.43677	NO
CXCL10	0.0133163	3.23264	0.117218	0.906719	0.956865	-6.43944	NO
TWEAK	0.00562136	5.32847	0.0807923	0.935629	0.956865	-6.44296	NO
CCL20	0.00950094	4.24628	0.0734174	0.941493	0.956865	-6.44352	NO
TRANCE	-0.00577896	2.03947	-0.0675107	0.946193	0.956865	-6.44393	NO
AXIN1	0.00639385	5.73493	0.0671693	0.946465	0.956865	-6.44395	NO
4E-BP1	0.000579515	8.66247	0.0191996	0.984687	0.984687	-6.44597	NO

## Sheet: Sup Table 3 Late
Biomarkers	log2FC	AveExpr	t	P.Value	adj.P.Val	B	DiffExp
CD8A	0.386684	3.10393	4.53486	6.67418e-06	0.000614024	3.43441	UP
CD5	0.450029	6.27421	4.35235	1.52685e-05	0.000702352	2.66055	UP
CD6	0.387691	3.35648	4.0919	4.7255e-05	0.00125212	1.60864	UP
CD40	0.326634	9.4896	4.05826	5.44401e-05	0.00125212	1.47728	UP
MCP-4	0.392733	11.9641	3.85584	0.000124876	0.0021022	0.70893	UP
CCL20	0.40928	4.27874	3.8325	0.0001371	0.0021022	0.622748	UP
CD244	0.266578	3.22221	3.56386	0.000387759	0.00509626	-0.332707	UP
PD-L1	0.197644	2.46746	3.15692	0.001656	0.0190439	-1.65183	UP
CXCL5	0.351544	10.6058	3.07166	0.00220295	0.022519	-1.90853	UP
CDCP1	0.153232	-0.10318	2.95327	0.00323911	0.0297998	-2.25359	UP
IL-12B	0.238061	2.57879	2.87202	0.00418966	0.0350408	-2.48273	UP
CXCL6	0.23969	7.22744	2.7798	0.00557067	0.0427084	-2.73521	UP
CCL25	0.184979	1.17456	2.66642	0.00782589	0.0553832	-3.03458	NO
Flt3L	0.162666	4.54802	2.58796	0.00983504	0.0610438	-3.23457	NO
DNER	0.13002	4.67436	2.56894	0.0103867	0.0610438	-3.28217	NO
CXCL11	0.301335	5.52059	2.56128	0.0106163	0.0610438	-3.30123	NO
TSLP	0.107487	-0.153829	2.53461	0.0114524	0.0619775	-3.3672	NO
TNFRSF9	0.169408	3.52986	2.47108	0.0136839	0.06994	-3.5216	NO
OPG	0.139289	4.54349	2.39886	0.0166811	0.0807714	-3.69245	NO
AXIN1	0.176226	5.74725	2.25373	0.024491	0.112659	-4.02064	NO
CSF-1	0.112963	5.73972	2.20871	0.0274863	0.117436	-4.11836	NO
TNFB	0.0813569	1.09728	2.19426	0.0285123	0.117436	-4.14931	NO
TRANCE	0.150649	2.05119	2.18267	0.029359	0.117436	-4.17398	NO
LAP TGF-beta-1	0.12382	5.37837	2.0705	0.0387352	0.148485	-4.40613	NO
uPA	0.143576	9.34534	2.01815	0.0439189	0.161621	-4.51034	NO
CCL19	0.145307	6.90666	1.96674	0.0495689	0.175398	-4.61011	NO
IL8	0.203208	8.44837	1.83972	0.0661902	0.221103	-4.84566	NO
ADA	0.0678532	10.8501	1.81052	0.0706018	0.221103	-4.89762	NO
CCL11	0.167395	4.07139	1.79501	0.0730407	0.221103	-4.92488	NO
CX3CL1	0.100835	0.85109	1.76877	0.0773246	0.221103	-4.97046	NO
IL7	0.0762667	-0.292421	1.76427	0.0780803	0.221103	-4.97822	NO
IL-18R1	0.164468	4.85654	1.75834	0.0790833	0.221103	-4.9884	NO
CXCL9	0.123748	1.66763	1.75702	0.0793088	0.221103	-4.99067	NO
MMP-10	0.13439	5.00952	1.70119	0.0893072	0.241655	-5.0848	NO
CXCL1	0.123718	10.3158	1.68119	0.0931281	0.244794	-5.1178	NO
TRAIL	0.105643	5.13877	1.55708	0.119858	0.303974	-5.31386	NO
MCP-2	0.126161	5.71133	1.53689	0.124729	0.303974	-5.34435	NO
TNFSF14	0.134935	6.26846	1.53344	0.125574	0.303974	-5.34951	NO
MMP-1	0.192836	12.127	1.52024	0.128858	0.303974	-5.36919	NO
IL-15RA	0.0597132	0.229026	1.48551	0.137816	0.316634	-5.42014	NO
SIRT2	0.0472492	7.50207	1.47318	0.141108	0.316634	-5.43795	NO
VEGFA	0.114105	10.543	1.40567	0.160222	0.350963	-5.53283	NO
MCP-1	0.143216	10.2468	1.31835	0.187776	0.401753	-5.64898	NO
EN-RAGE	-0.0924062	6.67198	-1.28635	0.198703	0.415471	-5.68969	NO
NRTN	-0.0371024	-0.779599	-1.23408	0.217546	0.444761	-5.75405	NO
CCL28	0.0408034	0.771161	1.18766	0.235332	0.470665	-5.80898	NO
IL-24	-0.079051	-0.148406	-1.12556	0.2607	0.510306	-5.87917	NO
IL18	0.0935594	9.52589	1.08723	0.27727	0.531435	-5.92062	NO
CCL23	0.0989269	8.08259	1.07227	0.28393	0.533093	-5.93641	NO
IL-10RA	0.0288345	-1.03338	1.03549	0.300763	0.549036	-5.97431	NO
CXCL10	0.0940973	3.23921	1.02781	0.304357	0.549036	-5.98205	NO
SCF	0.0671328	2.79177	1.00949	0.313054	0.553865	-6.0003	NO
IL10	0.0590402	-0.19375	0.994401	0.320337	0.556057	-6.01508	NO
IL-10RB	0.0457302	2.06233	0.925554	0.354965	0.604756	-6.07971	NO
IL-17A	0.038349	-0.608925	0.907726	0.364305	0.609382	-6.09569	NO
TWEAK	0.0471825	5.33273	0.817543	0.413869	0.668847	-6.17178	NO
IFN-gamma	0.108406	3.08669	0.803727	0.4218	0.668847	-6.18274	NO
IL-20	0.0230433	-0.169784	0.780022	0.435616	0.668847	-6.2011	NO
HGF	0.0704763	7.74038	0.779904	0.435685	0.668847	-6.20119	NO
IL6	0.112136	1.74988	0.779021	0.436204	0.668847	-6.20186	NO
LIF-R	0.0174327	0.422761	0.735371	0.462335	0.697292	-6.2342	NO
TGF-alpha	0.0511043	2.27799	0.719384	0.472121	0.700566	-6.24558	NO
FGF-19	0.0647626	2.61816	0.641875	0.521144	0.761036	-6.2972	NO
CST5	0.0703212	3.07056	0.616066	0.538031	0.77342	-6.31308	NO
IL-1 alpha	0.112617	2.97357	0.594047	0.552654	0.782218	-6.32612	NO
TNF	0.040428	0.715097	0.573533	0.56645	0.788068	-6.33784	NO
CASP-8	0.0275472	7.33572	0.557153	0.577584	0.788068	-6.3469	NO
FGF-5	0.0264665	0.0738418	0.535388	0.592535	0.788068	-6.35854	NO
IL-17C	0.051265	1.57519	0.520084	0.603153	0.788068	-6.36644	NO
LIF	-0.0164792	-0.330083	-0.509041	0.610868	0.788068	-6.372	NO
IL-22 RA1	0.0373575	-0.371753	0.504148	0.6143	0.788068	-6.37443	NO
ST1A1	-0.0350219	5.13163	-0.488638	0.625236	0.788068	-6.38196	NO
FGF-23	0.0335532	-0.142384	0.488526	0.625315	0.788068	-6.38202	NO
4E-BP1	-0.0124177	8.66095	-0.46724	0.640459	0.796247	-6.39197	NO
GDNF	0.0199859	0.579931	0.396619	0.691758	0.828068	-6.42183	NO
IL2	0.0168423	-0.0492671	0.391364	0.695635	0.828068	-6.42386	NO
SLAMF1	0.0182612	-0.358867	0.387176	0.698732	0.828068	-6.42545	NO
ARTN	-0.0189053	-0.73565	-0.382686	0.702058	0.828068	-6.42714	NO
IL4	-0.01609	-0.271963	-0.35587	0.722035	0.84085	-6.43684	NO
IL33	-0.0119423	0.93036	-0.317042	0.751297	0.857468	-6.44963	NO
IL-20RA	-0.0104008	-0.0702615	-0.29626	0.76711	0.857468	-6.45586	NO
STAMBP	0.00530781	9.75899	0.290653	0.771394	0.857468	-6.45747	NO
CCL4	-0.024039	5.30645	-0.287789	0.773585	0.857468	-6.45829	NO
CCL3	-0.03901	5.1373	-0.27174	0.785894	0.860741	-6.46268	NO
NT-3	0.0102753	1.38193	0.217577	0.827816	0.895989	-6.47565	NO
IL5	-0.00657463	-0.372308	-0.148928	0.881649	0.943159	-6.48797	NO
IL-2RB	0.00400017	-0.152871	0.114554	0.908828	0.958499	-6.4924	NO
OSM	-0.00915319	6.31096	-0.0960306	0.923521	0.958499	-6.49431	NO
MCP-3	-0.00729011	0.617533	-0.0784556	0.937486	0.958499	-6.49581	NO
Beta-NGF	0.00104327	1.55567	0.078234	0.937662	0.958499	-6.49583	NO
FGF-21	-0.00208119	2.02967	-0.0150939	0.987961	0.988374	-6.49872	NO
IL13	-0.000508429	-0.782914	-0.0145759	0.988374	0.988374	-6.49872	NO

## Sheet: Sup Table 4 Cytokines
Full name	Short	UniprotID
CUB domain-containing protein 1	CDCP1	Q9H5V8
Tumor necrosis factor (Ligand) superfamily, member 12	TWEAK	O43508
Delta and Notch-like epidermal growth factor-related receptor	DNER	Q8NFT8
Interleukin-8	IL-8	P10145
Tumor necrosis factor	TNF	P01375
Transforming growth factor alpha	TGF-α	P01135
Interleukin-12 subunit beta	IL-12B	P29460
C-C motif chemokine 19	CCL19	Q99731
C-X-C motif chemokine 5	CXCL5	P42830
TNF-related activation-induced cytokine	TRANCE	O14788
TNF-related apoptosis-inducing ligand	TRAIL	P50591
STAM-binding protein	STAMBP	O95630
Latency-associated peptide transforming growth factor beta-1	LAP TGF-beta-1	P01137
Matrix metalloproteinase-10	MMP-10	P09238
Osteoprotegerin	OPG	O00300
C-C motif chemokine 23	CCL23	P55773
C-X-C motif chemokine 9	CXCL9	Q07325
TNF-beta	TNFB	P01374
T-cell surface glycoprotein CD8 alpha chanin	CD8A	P01732
Macrophage colony-stimulating factor 1	CSF-1	P09603
Tumor necrosis factor receptor superfamily member 9	TNFRSF9	Q07011
Adenosine Deaminase	ADA	P00813
Protein S100-A12	EN-RAGE	P80511
Matrix metalloproteinase-1	MMP-1	P03956
Leukemia inhibitory factor receptor	LIF-R	P42702
Stem cell factor	SCF	P21583
Urokinase-type plasminogen activator	uPA	P00749
Eukaryotic translation initiation factor 4E-binding protein 1	4E-BP1	Q13541
Interleukine-18 receptor 1	IL-18R1	Q13478
C-C motif chemokine 25	CCL25	O15444
Fractalkine	CX3CL1	P78423
C-X-C motif chemokine 6	CXCL6	P80162
T-cell surface glycoprotein CD5	CD5	P06127
Monocyte chemotactic protein 1	MCP-1	P13500
Fibroblast growth factor 19	FGF-19	O95750
Vascular endothelial growth factor A	VEGFA	P15692
C-X-C motif chemokine 11	CXCL11	O14625
C-X-C motif chemokine 10	CXCL10	P02778
Natural killer cell receptor 2B4	CD244	Q9BZW8
C-C motif chemokine 3	CCL3	P10147
Interleukin-18	IL-18	Q14116
Monocyte chemotactic protein 2	MCP-2	P80075
Eotaxin	CCL11	P51671
CD40L receptor	CD40	P25942
T cell surface glycoprotein CD6 isoform	CD6	P30203
C-C motif chemokine 20	CCL20	P78556
Hepatocyte growth factor	HGF	P14210
Programmed cell death ligand 1	PD-L1	Q9NZQ7
Tumor necrosis factor ligand superfamily member 14	TNFSF14	O43557
C-C motif chemokine 4	CCL4	P13236
Cystatin D	CST5	P28325
Interleukin-10 receptor subunit beta	IL-10RB	Q08334
Fms-related tyrosine kinase 3 ligand	Flt3L	P49771
C-X-C motif chemokine 1	CXCL1	P09341
Monocyte chemotactic protein 4	MCP-4	Q99616
Interferon gamma	IFN-gamma	P01579
Interleukin-10	IL10	P22301
Axin-1	AXIN1	O15169
Monocyte chemotactic protein 3	MCP-3	P80098
Oncostatin-M	OSM	P13725
Interleukin-17C	IL-17C	Q9P0M4
Fibroblast growth factor 21	FGF-21	Q9NSA1
Caspase-8	CASP-8	Q14790
Interleukin-7	IL-7	P13232
C-C motif chemokine 28	CCL28	Q9NRJ3
Sulfotransferase 1A1	ST1A1	P50225
Interleukin-6	IL-6	P05231
Signaling lymphocytic activation molecule	SLAMF1	Q13291
Neurotrophin-3	NT-3	P20783
Interleukin-17A	IL-17A	Q16552
Interleukin-10 receptor subunit alpha	IL-10RA	Q13651
NAD-dependent protein deacetylase sirtuin-2	SIRT2	Q8IXJ6
Fibroblast growth factor 23	FGF-23	Q9GZV9
Interleukin-15 receptor subunit alpha	IL-15RA	Q13261
Interleukin-5	IL-5	P05113
Fibroblast growth factor 5	FGF-5	P12034
Interleukin-13	IL-13	P35225
Interleukin-4	IL-4	P05112
Neurturin	NRT	Q99748
Interleukin-20 receptor subunit alpha	IL-20RA	Q9UHF4
Interleukin-2 receptor subunit beta	IL-2RB	P14784
Artemin	ARTN	Q5T4W7
Interleukin-24	IL-24	Q13007
Leukemia inhibitory factor	LIF	P15018
Thymic stromal lymphopoietin	TSLP	Q969D9
Interleukin-22 receptor subunit alpha-1	IL-22 RA1	Q8N6P7
Interleukin-1 alpha	IL-1 alpha	P01583
Interleukin-20	IL-20	Q9NYY1
Glial cell line-derived neurotrophic factor	GDNF	P39905
Interleukin-33	IL-33	O95760
Beta-nerve growth factor	Beta-NGF	P01138
Interleukine-2	IL-2	P60568

## Sheet: SupTable 5 CytokineSummaryStat 
	Unexposed	Exposed	Overall
	(N=726)	(N=100)	(N=826)
IL8
Mean (SD)	8.43 (0.838)	8.64 (0.922)	8.46 (0.851)
Median [Min, Max]	8.43 [5.69, 13.9]	8.59 [6.48, 12.7]	8.44 [5.69, 13.9]
VEGFA
Mean (SD)	10.5 (0.622)	10.7 (0.627)	10.6 (0.625)
Median [Min, Max]	10.6 [6.98, 12.2]	10.7 [8.37, 12.0]	10.6 [6.98, 12.2]
CD8A
Mean (SD)	3.07 (0.636)	3.36 (0.703)	3.11 (0.651)
Median [Min, Max]	3.12 [0.825, 5.76]	3.46 [0.867, 4.76]	3.15 [0.825, 5.76]
MCP-3
Mean (SD)	0.622 (0.762)	0.568 (0.729)	0.616 (0.758)
Median [Min, Max]	0.549 [-1.00, 4.72]	0.473 [-0.628, 3.43]	0.541 [-1.00, 4.72]
GDNF
Mean (SD)	0.578 (0.380)	0.606 (0.330)	0.582 (0.375)
Median [Min, Max]	0.589 [-0.576, 2.23]	0.648 [-0.389, 1.33]	0.594 [-0.576, 2.23]
CDCP1
Mean (SD)	-0.116 (0.366)	-0.0238 (0.527)	-0.105 (0.390)
Median [Min, Max]	-0.156 [-0.961, 3.51]	-0.0999 [-0.806, 3.35]	-0.150 [-0.961, 3.51]
CD244
Mean (SD)	3.20 (0.559)	3.46 (0.585)	3.23 (0.568)
Median [Min, Max]	3.22 [1.45, 4.83]	3.52 [1.87, 4.70]	3.25 [1.45, 4.83]
IL7
Mean (SD)	-0.298 (0.321)	-0.231 (0.347)	-0.290 (0.325)
Median [Min, Max]	-0.276 [-1.19, 0.478]	-0.214 [-1.14, 0.593]	-0.274 [-1.19, 0.593]
OPG
Mean (SD)	4.53 (0.431)	4.67 (0.468)	4.55 (0.438)
Median [Min, Max]	4.53 [3.12, 6.34]	4.66 [3.19, 5.64]	4.54 [3.12, 6.34]
LAP TGF-beta-1
Mean (SD)	5.37 (0.442)	5.49 (0.473)	5.38 (0.447)
Median [Min, Max]	5.38 [3.67, 6.80]	5.56 [3.77, 6.44]	5.41 [3.67, 6.80]
uPA
Mean (SD)	9.34 (0.576)	9.53 (0.569)	9.36 (0.578)
Median [Min, Max]	9.38 [7.04, 11.1]	9.52 [7.68, 10.6]	9.39 [7.04, 11.1]
IL6
Mean (SD)	1.73 (1.09)	1.80 (1.42)	1.74 (1.13)
Median [Min, Max]	1.51 [0.00585, 11.0]	1.48 [-0.614, 8.34]	1.51 [-0.614, 11.0]
IL-17C
Mean (SD)	1.57 (0.812)	1.60 (0.850)	1.57 (0.816)
Median [Min, Max]	1.48 [-0.101, 5.18]	1.50 [0.168, 4.25]	1.48 [-0.101, 5.18]
MCP-1
Mean (SD)	10.2 (0.961)	10.2 (1.07)	10.2 (0.974)
Median [Min, Max]	10.4 [7.36, 14.3]	10.4 [7.78, 12.9]	10.4 [7.36, 14.3]
IL-17A
Mean (SD)	-0.612 (0.307)	-0.576 (0.345)	-0.607 (0.312)
Median [Min, Max]	-0.621 [-1.52, 1.94]	-0.610 [-1.41, 0.527]	-0.621 [-1.52, 1.94]
CXCL11
Mean (SD)	5.49 (0.877)	5.71 (0.972)	5.52 (0.891)
Median [Min, Max]	5.52 [2.63, 8.68]	5.68 [3.71, 7.92]	5.53 [2.63, 8.68]
AXIN1
Mean (SD)	5.73 (0.561)	5.85 (0.793)	5.75 (0.594)
Median [Min, Max]	5.82 [2.04, 7.15]	6.00 [1.25, 6.84]	5.84 [1.25, 7.15]
TRAIL
Mean (SD)	5.13 (0.545)	5.30 (0.509)	5.15 (0.543)
Median [Min, Max]	5.16 [3.41, 6.85]	5.32 [4.02, 6.53]	5.17 [3.41, 6.85]
IL-20RA
Mean (SD)	-0.0703 (0.262)	-0.0427 (0.250)	-0.0670 (0.260)
Median [Min, Max]	-0.0634 [-1.05, 1.27]	-0.0387 [-0.600, 0.586]	-0.0610 [-1.05, 1.27]
CXCL9
Mean (SD)	1.66 (0.531)	1.79 (0.578)	1.67 (0.538)
Median [Min, Max]	1.61 [0.225, 5.35]	1.77 [0.265, 3.54]	1.63 [0.225, 5.35]
CST5
Mean (SD)	3.06 (0.874)	3.23 (0.716)	3.08 (0.858)
Median [Min, Max]	2.96 [1.54, 10.6]	3.14 [1.94, 7.55]	2.98 [1.54, 10.6]
IL-2RB
Mean (SD)	-0.153 (0.259)	-0.155 (0.252)	-0.153 (0.258)
Median [Min, Max]	-0.166 [-1.14, 1.15]	-0.154 [-0.855, 0.628]	-0.162 [-1.14, 1.15]
IL-1 alpha
Mean (SD)	2.97 (1.44)	2.90 (1.54)	2.96 (1.45)
Median [Min, Max]	2.97 [-0.804, 7.12]	2.68 [-0.614, 6.54]	2.93 [-0.804, 7.12]
OSM
Mean (SD)	6.32 (0.785)	6.40 (0.840)	6.33 (0.791)
Median [Min, Max]	6.41 [2.55, 8.24]	6.47 [2.46, 8.06]	6.41 [2.46, 8.24]
IL2
Mean (SD)	-0.0500 (0.322)	-0.0108 (0.299)	-0.0453 (0.320)
Median [Min, Max]	-0.0436 [-1.18, 1.01]	-0.00911 [-0.750, 0.715]	-0.0390 [-1.18, 1.01]
CXCL1
Mean (SD)	10.3 (0.580)	10.5 (0.631)	10.3 (0.588)
Median [Min, Max]	10.4 [7.43, 12.5]	10.5 [8.14, 11.8]	10.4 [7.43, 12.5]
TSLP
Mean (SD)	-0.162 (0.317)	-0.105 (0.334)	-0.155 (0.319)
Median [Min, Max]	-0.148 [-1.29, 0.804]	-0.0697 [-1.70, 0.674]	-0.132 [-1.70, 0.804]
CCL4
Mean (SD)	5.31 (0.631)	5.31 (0.587)	5.31 (0.625)
Median [Min, Max]	5.28 [3.42, 7.89]	5.35 [3.96, 6.59]	5.29 [3.42, 7.89]
CD6
Mean (SD)	3.32 (0.715)	3.66 (0.827)	3.36 (0.737)
Median [Min, Max]	3.32 [1.17, 5.22]	3.76 [1.50, 5.19]	3.36 [1.17, 5.22]
SCF
Mean (SD)	2.78 (0.518)	2.86 (0.568)	2.79 (0.525)
Median [Min, Max]	2.75 [1.49, 4.65]	2.81 [1.07, 4.25]	2.75 [1.07, 4.65]
IL18
Mean (SD)	9.52 (0.650)	9.46 (0.734)	9.51 (0.661)
Median [Min, Max]	9.55 [6.52, 11.1]	9.38 [8.16, 11.0]	9.53 [6.52, 11.1]
SLAMF1
Mean (SD)	-0.360 (0.351)	-0.336 (0.361)	-0.357 (0.352)
Median [Min, Max]	-0.360 [-2.09, 0.923]	-0.310 [-1.23, 0.455]	-0.356 [-2.09, 0.923]
TGF-alpha
Mean (SD)	2.27 (0.535)	2.45 (0.605)	2.30 (0.546)
Median [Min, Max]	2.27 [0.947, 4.05]	2.44 [1.01, 4.20]	2.31 [0.947, 4.20]
MCP-4
Mean (SD)	11.9 (0.806)	12.1 (0.816)	12.0 (0.809)
Median [Min, Max]	12.0 [8.72, 13.8]	12.3 [9.62, 13.5]	12.0 [8.72, 13.8]
CCL11
Mean (SD)	4.06 (0.837)	4.08 (0.855)	4.07 (0.838)
Median [Min, Max]	4.22 [1.02, 6.08]	4.25 [1.76, 5.40]	4.23 [1.02, 6.08]
TNFSF14
Mean (SD)	6.26 (0.683)	6.52 (0.723)	6.29 (0.693)
Median [Min, Max]	6.29 [3.50, 7.97]	6.59 [4.27, 8.20]	6.33 [3.50, 8.20]
FGF-23
Mean (SD)	-0.148 (0.542)	-0.0697 (0.492)	-0.139 (0.537)
Median [Min, Max]	-0.227 [-1.23, 4.23]	-0.106 [-0.941, 2.78]	-0.211 [-1.23, 4.23]
IL-10RA
Mean (SD)	-1.04 (0.206)	-0.984 (0.201)	-1.03 (0.206)
Median [Min, Max]	-1.01 [-1.70, -0.370]	-0.960 [-1.50, -0.562]	-1.01 [-1.70, -0.370]
FGF-5
Mean (SD)	0.0726 (0.370)	0.147 (0.343)	0.0814 (0.368)
Median [Min, Max]	0.170 [-0.972, 0.784]	0.236 [-0.746, 0.906]	0.181 [-0.972, 0.906]
MMP-1
Mean (SD)	12.1 (0.957)	12.4 (0.977)	12.1 (0.965)
Median [Min, Max]	12.2 [8.54, 14.6]	12.4 [9.90, 15.1]	12.2 [8.54, 15.1]
LIF-R
Mean (SD)	0.420 (0.179)	0.435 (0.195)	0.422 (0.181)
Median [Min, Max]	0.415 [-0.110, 1.30]	0.404 [0.00390, 0.973]	0.415 [-0.110, 1.30]
FGF-21
Mean (SD)	2.03 (1.10)	2.00 (0.993)	2.03 (1.09)
Median [Min, Max]	1.92 [-0.662, 5.66]	1.98 [-0.513, 4.33]	1.94 [-0.662, 5.66]
CCL19
Mean (SD)	6.90 (0.578)	6.90 (0.658)	6.90 (0.588)
Median [Min, Max]	6.93 [3.72, 9.89]	6.94 [4.87, 8.32]	6.93 [3.72, 9.89]
IL-15RA
Mean (SD)	0.224 (0.299)	0.291 (0.317)	0.232 (0.302)
Median [Min, Max]	0.204 [-0.528, 2.53]	0.316 [-0.665, 1.06]	0.211 [-0.665, 2.53]
IL-10RB
Mean (SD)	2.06 (0.378)	2.10 (0.407)	2.06 (0.382)
Median [Min, Max]	2.06 [0.753, 3.32]	2.06 [1.03, 3.01]	2.06 [0.753, 3.32]
IL-22 RA1
Mean (SD)	-0.375 (0.563)	-0.333 (0.458)	-0.370 (0.551)
Median [Min, Max]	-0.359 [-2.86, 1.49]	-0.344 [-1.63, 0.666]	-0.356 [-2.86, 1.49]
IL-18R1
Mean (SD)	4.84 (0.712)	5.08 (0.800)	4.87 (0.727)
Median [Min, Max]	4.86 [1.88, 7.02]	5.05 [3.36, 7.28]	4.88 [1.88, 7.28]
PD-L1
Mean (SD)	2.45 (0.462)	2.65 (0.574)	2.47 (0.481)
Median [Min, Max]	2.45 [0.973, 4.25]	2.63 [1.36, 3.86]	2.46 [0.973, 4.25]
Beta-NGF
Mean (SD)	1.56 (0.0971)	1.57 (0.0836)	1.56 (0.0956)
Median [Min, Max]	1.56 [1.23, 2.03]	1.57 [1.34, 1.76]	1.56 [1.23, 2.03]
CXCL5
Mean (SD)	10.6 (0.918)	10.9 (0.931)	10.6 (0.926)
Median [Min, Max]	10.5 [7.91, 13.2]	10.7 [8.45, 13.3]	10.6 [7.91, 13.3]
TRANCE
Mean (SD)	2.04 (0.523)	2.14 (0.525)	2.05 (0.524)
Median [Min, Max]	2.04 [0.329, 3.62]	2.11 [1.10, 3.48]	2.04 [0.329, 3.62]
HGF
Mean (SD)	7.74 (0.708)	7.93 (0.758)	7.76 (0.716)
Median [Min, Max]	7.78 [4.76, 10.0]	8.02 [5.30, 9.52]	7.80 [4.76, 10.0]
IL-12B
Mean (SD)	2.56 (0.639)	2.70 (0.700)	2.58 (0.647)
Median [Min, Max]	2.57 [0.0834, 7.27]	2.65 [1.30, 7.12]	2.59 [0.0834, 7.27]
IL-24
Mean (SD)	-0.141 (0.521)	-0.151 (0.537)	-0.143 (0.522)
Median [Min, Max]	-0.0341 [-1.93, 1.01]	-0.117 [-1.85, 0.760]	-0.0365 [-1.93, 1.01]
IL13
Mean (SD)	-0.783 (0.256)	-0.742 (0.273)	-0.778 (0.258)
Median [Min, Max]	-0.790 [-1.73, 0.220]	-0.750 [-1.39, -0.0920]	-0.788 [-1.73, 0.220]
ARTN
Mean (SD)	-0.734 (0.367)	-0.706 (0.362)	-0.730 (0.366)
Median [Min, Max]	-0.666 [-1.90, 1.08]	-0.626 [-1.59, 0.0331]	-0.662 [-1.90, 1.08]
MMP-10
Mean (SD)	5.00 (0.627)	5.14 (0.571)	5.02 (0.622)
Median [Min, Max]	5.03 [2.45, 7.24]	5.19 [3.97, 6.83]	5.04 [2.45, 7.24]
IL10
Mean (SD)	-0.201 (0.444)	-0.117 (0.642)	-0.191 (0.473)
Median [Min, Max]	-0.231 [-1.21, 4.06]	-0.210 [-1.39, 3.55]	-0.228 [-1.39, 4.06]
TNF
Mean (SD)	0.712 (0.540)	0.780 (0.535)	0.720 (0.539)
Median [Min, Max]	0.684 [-0.0595, 7.64]	0.730 [0.236, 5.37]	0.687 [-0.0595, 7.64]
CCL23
Mean (SD)	8.08 (0.764)	8.19 (0.779)	8.09 (0.766)
Median [Min, Max]	8.13 [5.38, 11.2]	8.26 [5.70, 10.0]	8.13 [5.38, 11.2]
CD5
Mean (SD)	6.24 (0.776)	6.66 (0.877)	6.29 (0.801)
Median [Min, Max]	6.27 [2.92, 8.17]	6.76 [4.03, 8.15]	6.33 [2.92, 8.17]
CCL3
Mean (SD)	5.14 (1.11)	5.29 (1.35)	5.15 (1.14)
Median [Min, Max]	5.00 [3.07, 12.8]	5.11 [3.54, 12.6]	5.02 [3.07, 12.8]
Flt3L
Mean (SD)	4.53 (0.480)	4.66 (0.496)	4.55 (0.484)
Median [Min, Max]	4.57 [2.46, 5.91]	4.76 [3.28, 5.73]	4.59 [2.46, 5.91]
CXCL6
Mean (SD)	7.21 (0.689)	7.45 (0.754)	7.24 (0.701)
Median [Min, Max]	7.20 [4.99, 9.50]	7.45 [5.51, 9.40]	7.25 [4.99, 9.50]
CXCL10
Mean (SD)	3.23 (0.700)	3.30 (0.780)	3.24 (0.710)
Median [Min, Max]	3.21 [1.48, 7.36]	3.28 [1.52, 5.09]	3.23 [1.48, 7.36]
4E-BP1
Mean (SD)	8.66 (0.182)	8.65 (0.287)	8.66 (0.197)
Median [Min, Max]	8.67 [7.77, 9.16]	8.67 [6.67, 9.09]	8.67 [6.67, 9.16]
IL-20
Mean (SD)	-0.171 (0.218)	-0.129 (0.235)	-0.166 (0.221)
Median [Min, Max]	-0.161 [-0.754, 0.506]	-0.141 [-0.684, 0.538]	-0.159 [-0.754, 0.538]
SIRT2
Mean (SD)	7.50 (0.238)	7.58 (0.261)	7.51 (0.242)
Median [Min, Max]	7.52 [6.34, 8.18]	7.61 [6.04, 8.11]	7.53 [6.04, 8.18]
CCL28
Mean (SD)	0.767 (0.260)	0.790 (0.199)	0.770 (0.254)
Median [Min, Max]	0.748 [0.0682, 3.84]	0.783 [0.316, 1.41]	0.754 [0.0682, 3.84]
DNER
Mean (SD)	4.66 (0.389)	4.77 (0.406)	4.68 (0.392)
Median [Min, Max]	4.66 [3.40, 5.94]	4.78 [3.80, 6.03]	4.67 [3.40, 6.03]
EN-RAGE
Mean (SD)	6.68 (0.554)	6.73 (0.617)	6.69 (0.562)
Median [Min, Max]	6.69 [4.17, 8.41]	6.72 [5.41, 8.29]	6.70 [4.17, 8.41]
CD40
Mean (SD)	9.46 (0.597)	9.70 (0.690)	9.49 (0.613)
Median [Min, Max]	9.52 [6.94, 11.2]	9.71 [7.37, 11.1]	9.54 [6.94, 11.2]
IL33
Mean (SD)	0.931 (0.282)	0.935 (0.245)	0.932 (0.278)
Median [Min, Max]	0.934 [0.00464, 1.88]	0.935 [0.289, 1.47]	0.934 [0.00464, 1.88]
IFN-gamma
Mean (SD)	3.08 (1.07)	3.11 (1.19)	3.08 (1.08)
Median [Min, Max]	2.90 [0.679, 8.91]	3.02 [1.25, 7.71]	2.91 [0.679, 8.91]
FGF-19
Mean (SD)	2.61 (0.770)	2.86 (0.841)	2.64 (0.783)
Median [Min, Max]	2.51 [1.04, 5.44]	2.81 [1.14, 4.93]	2.55 [1.04, 5.44]
IL4
Mean (SD)	-0.270 (0.338)	-0.232 (0.328)	-0.266 (0.337)
Median [Min, Max]	-0.277 [-1.48, 1.75]	-0.195 [-1.06, 0.616]	-0.271 [-1.48, 1.75]
LIF
Mean (SD)	-0.329 (0.244)	-0.314 (0.208)	-0.327 (0.240)
Median [Min, Max]	-0.342 [-1.02, 1.15]	-0.306 [-0.892, 0.705]	-0.334 [-1.02, 1.15]
NRTN
Mean (SD)	-0.777 (0.224)	-0.774 (0.226)	-0.777 (0.224)
Median [Min, Max]	-0.782 [-1.36, 0.197]	-0.765 [-1.40, -0.274]	-0.780 [-1.40, 0.197]
MCP-2
Mean (SD)	5.70 (0.623)	5.77 (0.601)	5.71 (0.621)
Median [Min, Max]	5.70 [3.57, 10.3]	5.75 [4.09, 7.66]	5.71 [3.57, 10.3]
CASP-8
Mean (SD)	7.33 (0.371)	7.38 (0.456)	7.34 (0.382)
Median [Min, Max]	7.33 [4.93, 8.55]	7.44 [5.54, 8.57]	7.34 [4.93, 8.57]
CCL25
Mean (SD)	1.16 (0.547)	1.35 (0.559)	1.18 (0.552)
Median [Min, Max]	1.16 [-0.851, 3.30]	1.33 [-0.374, 2.90]	1.19 [-0.851, 3.30]
CX3CL1
Mean (SD)	0.842 (0.425)	0.934 (0.425)	0.853 (0.426)
Median [Min, Max]	0.823 [-0.500, 2.29]	0.956 [-0.114, 2.00]	0.835 [-0.500, 2.29]
TNFRSF9
Mean (SD)	3.52 (0.537)	3.68 (0.542)	3.54 (0.540)
Median [Min, Max]	3.54 [1.58, 5.18]	3.60 [2.40, 4.89]	3.55 [1.58, 5.18]
NT-3
Mean (SD)	1.38 (0.352)	1.41 (0.326)	1.39 (0.349)
Median [Min, Max]	1.40 [0.173, 2.26]	1.41 [0.512, 2.23]	1.40 [0.173, 2.26]
TWEAK
Mean (SD)	5.33 (0.425)	5.37 (0.468)	5.33 (0.430)
Median [Min, Max]	5.31 [3.92, 6.53]	5.37 [3.70, 6.37]	5.32 [3.70, 6.53]
CCL20
Mean (SD)	4.25 (0.786)	4.51 (0.994)	4.28 (0.818)
Median [Min, Max]	4.16 [1.77, 7.96]	4.43 [2.36, 7.80]	4.17 [1.77, 7.96]
ST1A1
Mean (SD)	5.14 (0.530)	5.13 (0.644)	5.14 (0.544)
Median [Min, Max]	5.19 [1.50, 6.30]	5.20 [1.01, 6.34]	5.19 [1.01, 6.34]
STAMBP
Mean (SD)	9.76 (0.127)	9.76 (0.179)	9.76 (0.135)
Median [Min, Max]	9.77 [9.13, 10.1]	9.78 [8.57, 10.0]	9.77 [8.57, 10.1]
IL5
Mean (SD)	-0.372 (0.329)	-0.346 (0.311)	-0.369 (0.327)
Median [Min, Max]	-0.382 [-1.48, 1.17]	-0.329 [-1.03, 0.436]	-0.372 [-1.48, 1.17]
ADA
Mean (SD)	10.8 (0.284)	10.9 (0.306)	10.9 (0.288)
Median [Min, Max]	10.9 [9.69, 11.6]	10.9 [9.90, 11.4]	10.9 [9.69, 11.6]
TNFB
Mean (SD)	1.09 (0.283)	1.14 (0.267)	1.10 (0.281)
Median [Min, Max]	1.08 [0.159, 1.95]	1.14 [0.473, 1.80]	1.09 [0.159, 1.95]
CSF-1
Mean (SD)	5.73 (0.389)	5.76 (0.379)	5.73 (0.388)
Median [Min, Max]	5.75 [4.08, 6.84]	5.79 [4.83, 6.48]	5.76 [4.08, 6.84]

## Sheet: Index
Supplemental Table 1	Differentially Regulated Inflammatory Markers in Overall Analysis, significant at 5% FDR.
Supplemental Table 2	Differentially Regulated Inflammatory Markers in Early Infection model, significant at 5% FDR.
Supplemental Table 3	Differentially Regulated Inflammatory Markers in Late Infection model, significant at 5%FDR.
Supplemental Table 4	92 Inflammatory Markers measured using Olink Infmmaltion Assay
Supplemental Table 5	Summary statistics of NPX levels of each inflammatory marker measured (n-92)
